# Supplementary material for: Simple and low-cost thiophene and benzene-conjugated triaryamines as hole-transporting materials for perovskite solar cells
Source: Royal Society of Chemistry journal article supplement (doi:10.1039/c7ra08052b), 2017-01-01
Supplement: c7ra08052b1.pdf [file c7ra08052b1.pdf]

# Simple and low-cost thiophene and benzene-conjugated triarylamines as hole-transporting materials for perovskite solar cells

Jianchang Wu<sup>a,b,†</sup>, Chang Liu<sup>b,†</sup>, Xiang Deng<sup>b</sup>, Luozheng Zhang<sup>b</sup>, Manman Hu<sup>b</sup>, Jun Tang<sup>a,b</sup>, Wenchang Tan<sup>b,\*</sup>, Yanqing Tian<sup>b,\*</sup>, Baomin Xu<sup>b,\*</sup>

a. School of Advanced Materials, Peking University Shenzhen Graduate School, Shenzhen, Guangdong 518055,

P.R. China

b. Department of Materials Science and Engineering, Southern University of Science and Technology, No. 1088,

Xueyuan Rd., Shenzhen, Guangdong 518055, P. R. China

<sup>†</sup> These authors contributed equally.

(E-mail: tanwch@pku.edu.cn, tianyq@sustc.edu.cn, xubm@sustc.edu.cn)

## Content:

Scheme S1. Synthetic scheme for the preparation of HTM1 and HTM2

Figure S1. <sup>1</sup>H NMR of HTM1 in DMSO-*d*<sub>6</sub>

Figure S2. <sup>13</sup>C NMR of HTM1 in DMSO-*d*<sub>6</sub>.

Figure S3. <sup>1</sup>H NMR of HTM2 in CD<sub>2</sub>Cl<sub>2</sub>.

Figure S4. <sup>13</sup>C NMR of HTM2 in CD<sub>2</sub>Cl<sub>2</sub>.

Figure S5. HRMS of HTM1.

Figure S6. HRMS of HTM2.

Figure S7. TGA of HTM1 and HTM2

Figure S8. DSC of HTM1 and HTM2

Figure S9. SCLC measurement of the HTMs films. Hole-only devices structure:

FTO/PEDOT:PSS/HTM/Au.

Table S1. Materials, quantities and cost for the synthesis of HTM1 and HTM2

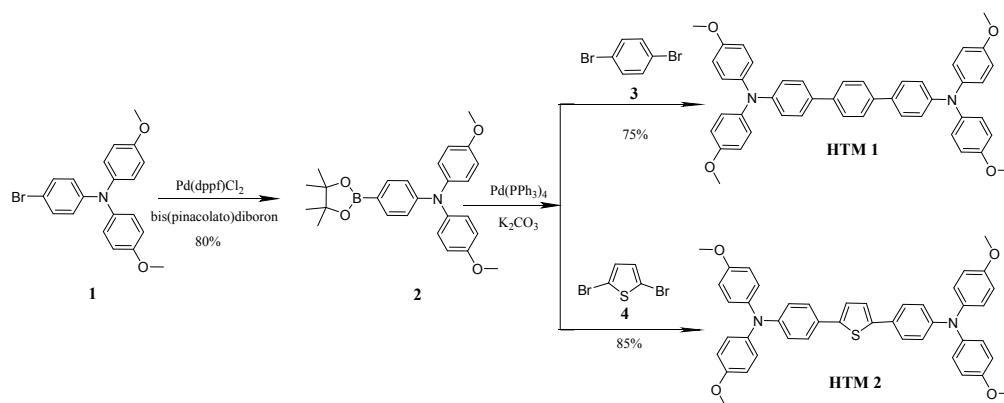

**Scheme S1.** Synthetic scheme for the preparation of HTM1 and HTM2.

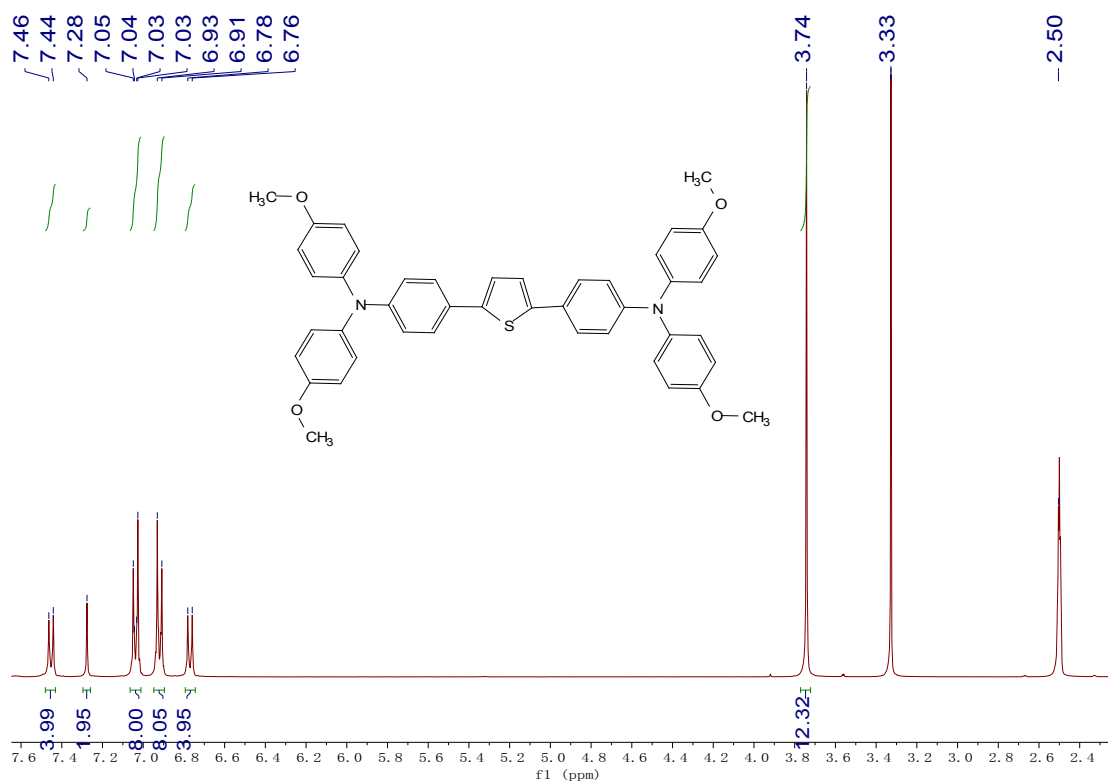

**Figure S1.**  $^1\text{H NMR}$  of HTM1 in  $\text{DMSO-}d_6$ .

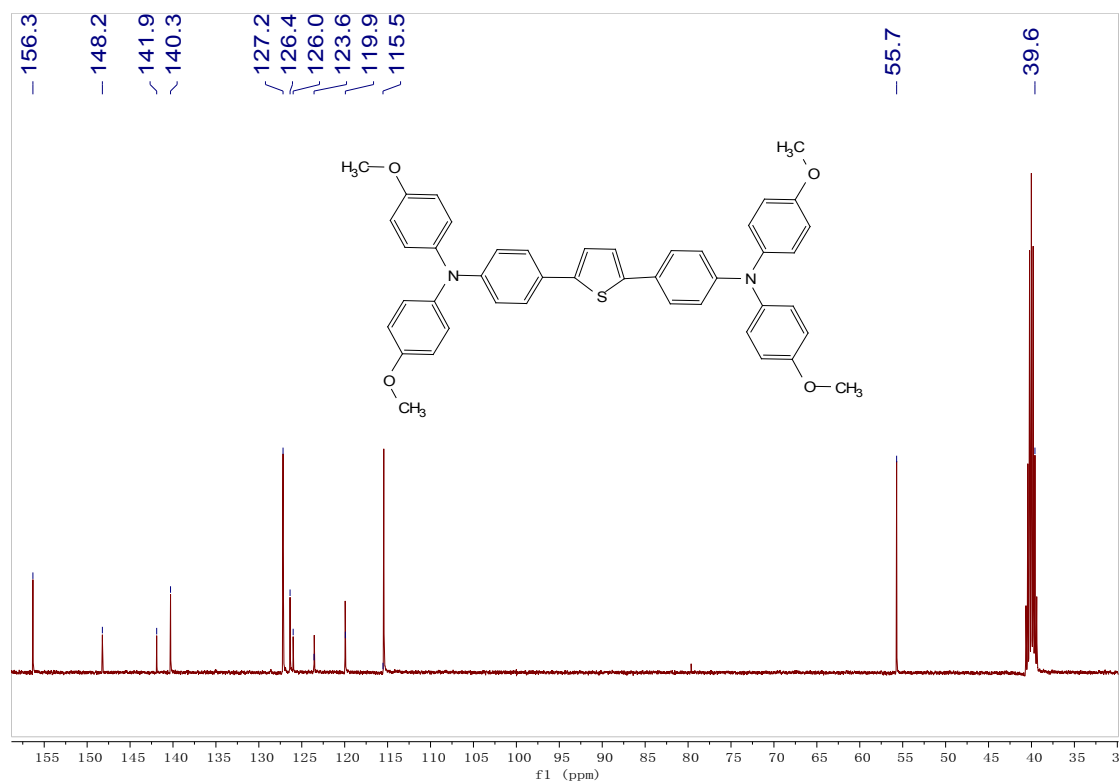

**Figure S2.**  $^{13}\text{C}$  NMR of HTM1 in  $\text{DMSO-}d_6$ .

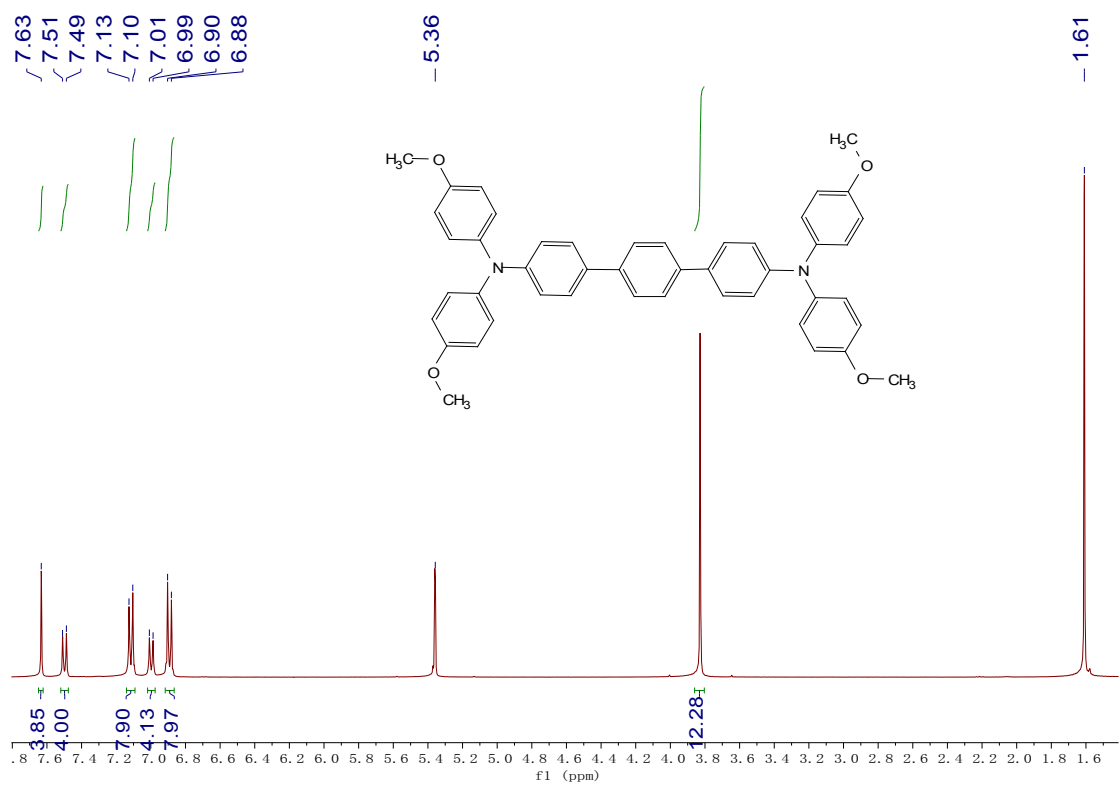

**Figure S3.**  $^1\text{H}$  NMR of HTM2 in  $\text{CD}_2\text{Cl}_2$ .

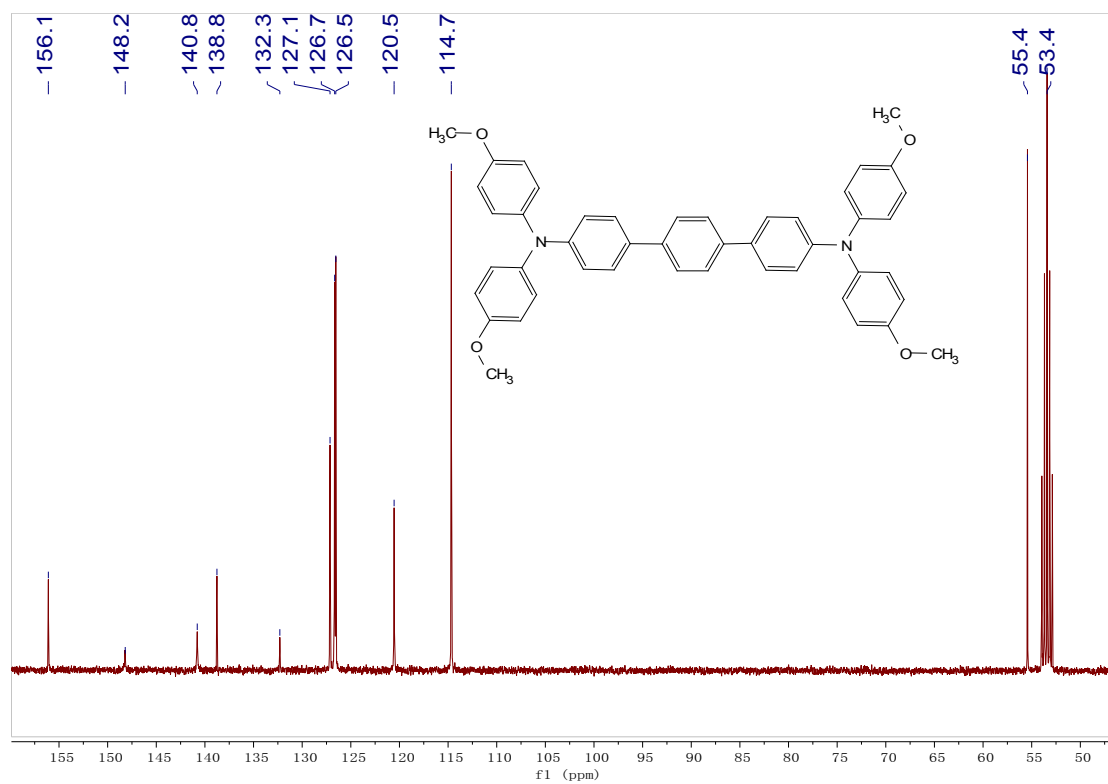

Figure S4.  $^{13}\text{C}$  NMR of HTM2 in  $\text{CD}_2\text{Cl}_2$ .

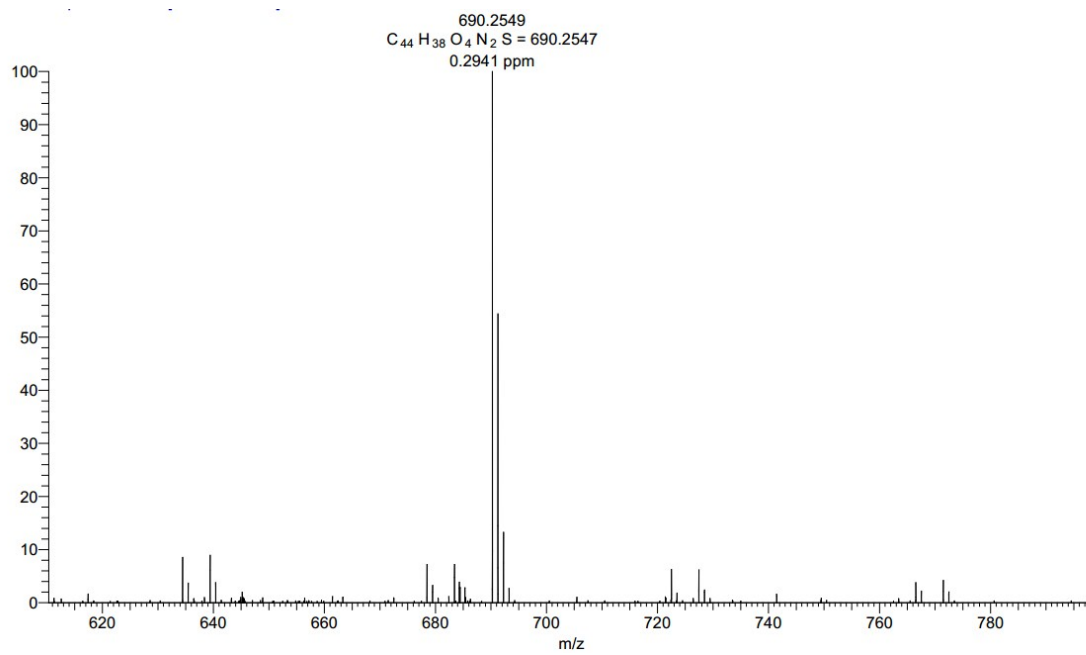

Figure S5. HRMS of HTM1.

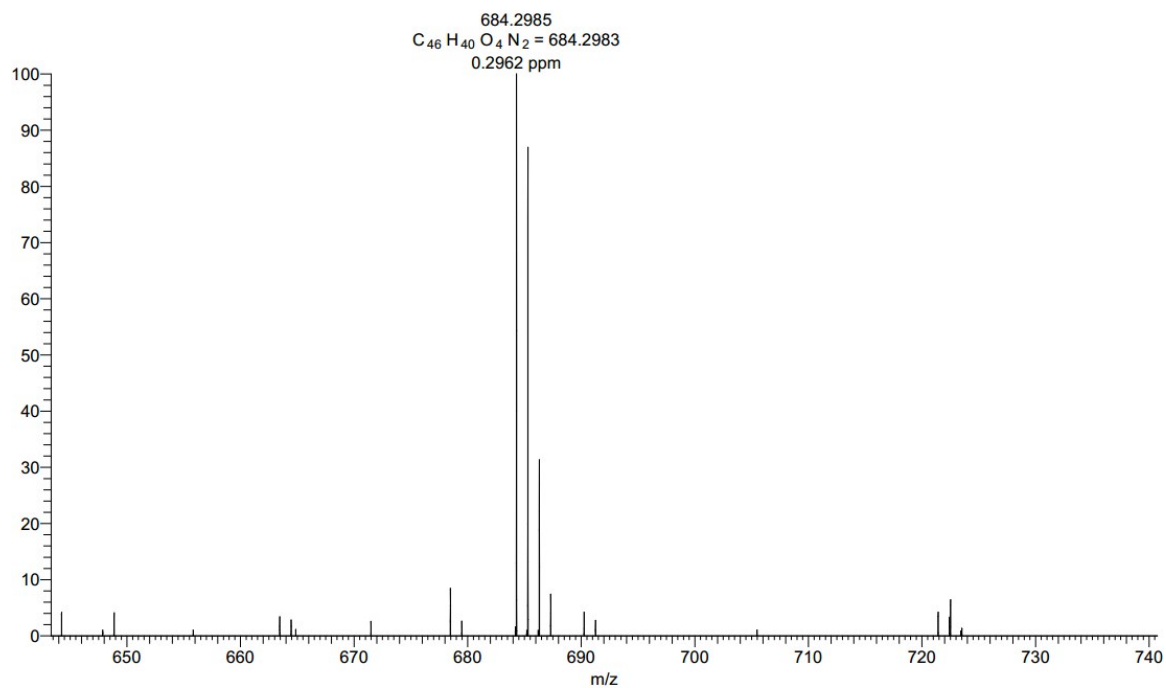

Figure S6. HRMS of HTM2.

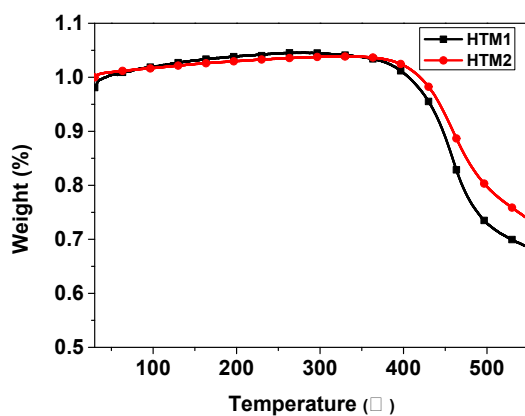

Figure S7. TGA of HTM1 and HTM2

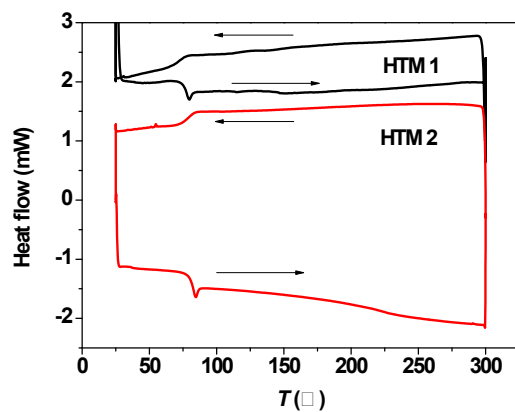

Figure S8. DSC of HTM1 and HTM2

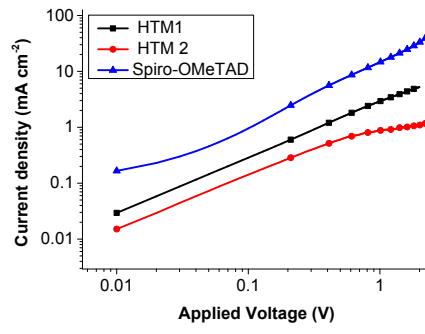

**Figure S9.** SCLC measurement of the HTMs films. Hole-only devices structure:

FTO/PEDOT:PSS/HTM/Au.

Table S1. Materials, quantities and cost for the synthesis of HTM1 and HTM2

| <b>Chemical</b>                                                                     | <b>Weight<br/>reagent<br/>(g/g)</b> | <b>Weight<br/>solvent<br/>(g/g)</b> | <b>Weight<br/>workup<br/>(g/g)</b> | <b>Price of<br/>chemical<br/>(\$/kg)</b> | <b>Cost of<br/>chemical<br/>(\$/g<br/>product)</b> | <b>Total<br/>Cost<br/>(\$/g)</b> |
|-------------------------------------------------------------------------------------|-------------------------------------|-------------------------------------|------------------------------------|------------------------------------------|----------------------------------------------------|----------------------------------|
| 4-bromo-N,N-bis(4-methoxyphenyl)aniline                                             | 1.11                                |                                     |                                    | 1185.19                                  | 1.32                                               |                                  |
| bis(pinacolato)diboron                                                              | 0.88                                |                                     |                                    | 362.67                                   | 0.32                                               |                                  |
| Pd(dppf)Cl <sub>2</sub>                                                             | 0.12                                |                                     |                                    | 9822.22                                  | 1.18                                               |                                  |
| KOAc                                                                                | 0.84                                |                                     |                                    | 32.00                                    | 0.03                                               |                                  |
| dioxane                                                                             |                                     | 15.00                               |                                    | 8.00                                     | 0.12                                               |                                  |
| CH <sub>2</sub> Cl <sub>2</sub>                                                     |                                     |                                     | 20.00                              | 4.44                                     | 0.09                                               |                                  |
| water                                                                               |                                     |                                     | 10.00                              |                                          | 0.00                                               |                                  |
| methanol                                                                            |                                     |                                     | 15.00                              | 4.00                                     | 0.06                                               |                                  |
| <b>OMT BPIN</b>                                                                     |                                     |                                     |                                    |                                          |                                                    | <b>3.11</b>                      |
| OMT BPIN                                                                            | 1.61                                |                                     |                                    | 3109.63                                  | 5.01                                               |                                  |
| 2,5-dibromothiophene                                                                | 0.41                                |                                     |                                    | 710.52                                   | 0.29                                               |                                  |
| Pd(PPh <sub>3</sub> ) <sub>4</sub>                                                  | 0.10                                |                                     |                                    | 16000.00                                 | 1.60                                               |                                  |
| THF                                                                                 |                                     | 17.80                               |                                    | 11.85                                    | 0.21                                               |                                  |
| K <sub>2</sub> CO <sub>3</sub>                                                      | 1.17                                |                                     |                                    | 7.41                                     | 0.01                                               |                                  |
| water                                                                               |                                     | 10.00                               |                                    |                                          | 0.00                                               |                                  |
| CH <sub>2</sub> Cl <sub>2</sub>                                                     |                                     |                                     | 80.00                              | 4.44                                     | 0.36                                               |                                  |
| Na <sub>2</sub> SO <sub>4</sub>                                                     |                                     |                                     | 5.00                               | 3.26                                     | 0.02                                               |                                  |
| Petroleum ether                                                                     |                                     |                                     | 100.00                             | 7.41                                     | 0.74                                               |                                  |
| silica gel                                                                          |                                     |                                     | 30.00                              | 10.96                                    | 0.33                                               |                                  |
| <b>2,5-bis(4,4'-<br/>bis(methoxyphenyl)aminophen-4''-yl)-<br/>thiophene (HTM 1)</b> |                                     |                                     |                                    |                                          |                                                    | <b>8.56</b>                      |
| OMT BPIN                                                                            | 1.84                                |                                     |                                    | 3109.63                                  | 5.72                                               |                                  |
| 2,5-dibromobenzene                                                                  | 0.46                                |                                     |                                    | 120.44                                   | 0.06                                               |                                  |
| Pd(PPh <sub>3</sub> ) <sub>4</sub>                                                  | 0.11                                |                                     |                                    | 16000.00                                 | 1.76                                               |                                  |
| THF                                                                                 |                                     | 17.80                               |                                    | 11.85                                    | 0.21                                               |                                  |
| K <sub>2</sub> CO <sub>3</sub>                                                      | 1.34                                |                                     |                                    | 7.41                                     | 0.01                                               |                                  |
| water                                                                               |                                     |                                     | 10.00                              |                                          |                                                    |                                  |
| CH <sub>2</sub> Cl <sub>2</sub>                                                     |                                     |                                     | 80.00                              | 4.44                                     | 0.36                                               |                                  |
| Na <sub>2</sub> SO <sub>4</sub>                                                     |                                     |                                     | 5.00                               | 3.26                                     | 0.02                                               |                                  |
| Petroleum ether                                                                     |                                     |                                     | 100.00                             | 7.41                                     | 0.74                                               |                                  |
| silica gel                                                                          |                                     |                                     | 40.00                              | 10.96                                    | 0.44                                               |                                  |
| <b>2,5-bis(4,4'-<br/>bis(methoxyphenyl)aminophen-4''-yl)-</b>                       |                                     |                                     |                                    |                                          |                                                    | <b>9.31</b>                      |

---

thiophene (HTM 2)

---
